# Supplementary material
Source: PubMed Central journal article supplement (PMC3315694)
Supplement: NIHMS361666-supplement-01.pdf [file NIHMS361666-supplement-01.pdf]

**Immunity, Volume 36**

**Supplemental Information**

**The Circadian Clock Controls Toll-like**

**Receptor 9-Mediated Innate and Adaptive Immunity**

Adam C. Silver, Alvaro Arjona, Wendy E. Walker, and Erol Fikrig

## Figure S1

-221  
.  
CTGGGTTTTGGTTCCCTCCACAGCTCTTTGGGGGGTGGGGGCATATGTGATACCCT

-163  
.  
TTGGCTGATTGTGGGTGGGAGGAGAGTGGAAAGAGGAAGGGTGAGGGGTTATCT

-105  
.  
E-box E-box  
GTCTG CCATCTG ACTATGCAAATGATGTGTGACTCATTGTAC CACCTG CTCTTTCAGG

-47  
.  
GTAGGGACAAAGTAGCTACTAAGCTGTAGTGAAAGT +1 → GTCACCTTCTC AATTCTCTGAG

### Figure S1. E-boxes in the *Tlr9* promoter region.

Non-canonical E-boxes, E-box63 (CACCTG) and E-box99 (CATCTG), in the proximal region of the murine *Tlr9* promoter.

Figure S2

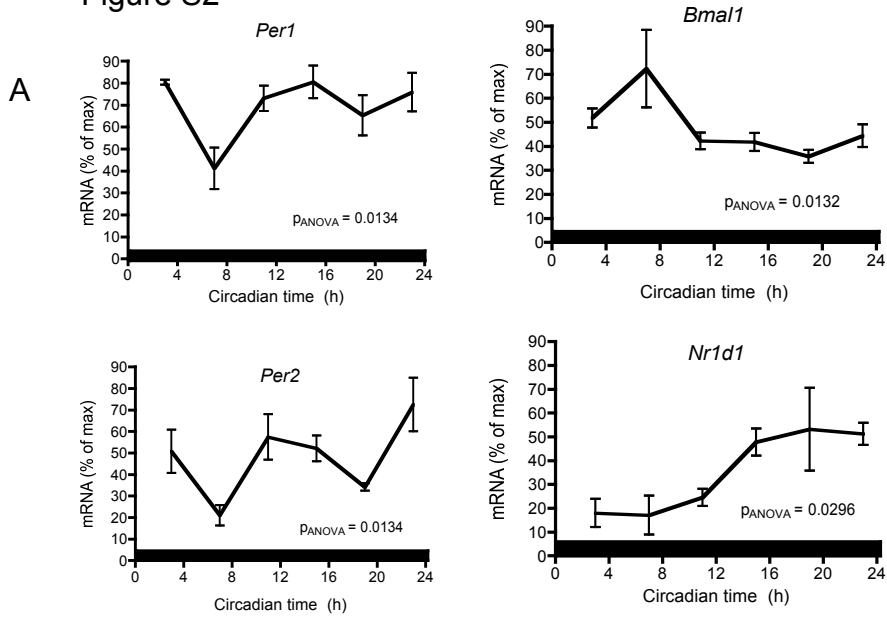

spleen

splenic macrophages

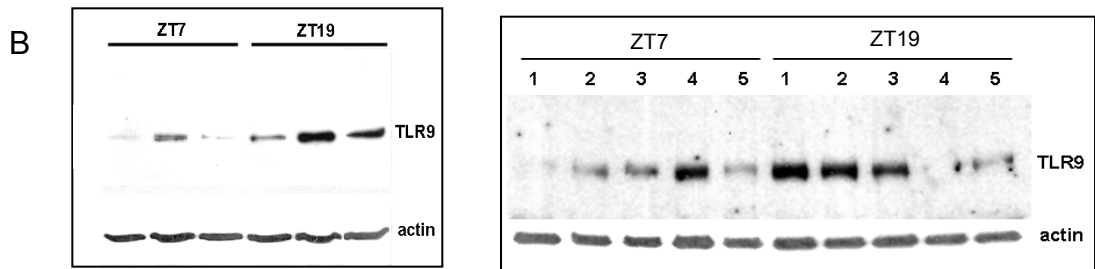

splenic B cells

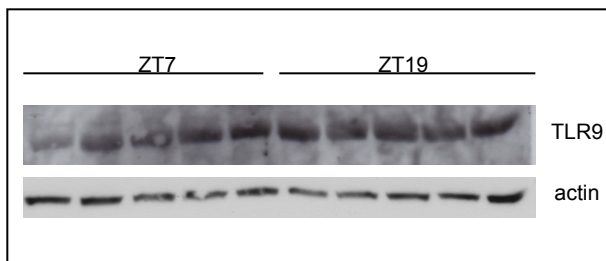

**Figure S2.**

(A) Circadian oscillations of canonical clock genes expression in spleen under constant conditions. Relative mRNA amounts at each time point were calculated as the percentage of the maximum value over the 24-h period. Data are mean  $\pm$  s.e.m.,  $n = 3-5$  mice per time point.

(B) Daily variations in TLR9 protein amounts. TLR9 protein amount determined by immunoblot in the spleen, splenic macrophages, and splenic B cells at ZT7 and ZT19. Actin was used as normalizing factor. Representative immunoblots are shown.

Figure S3

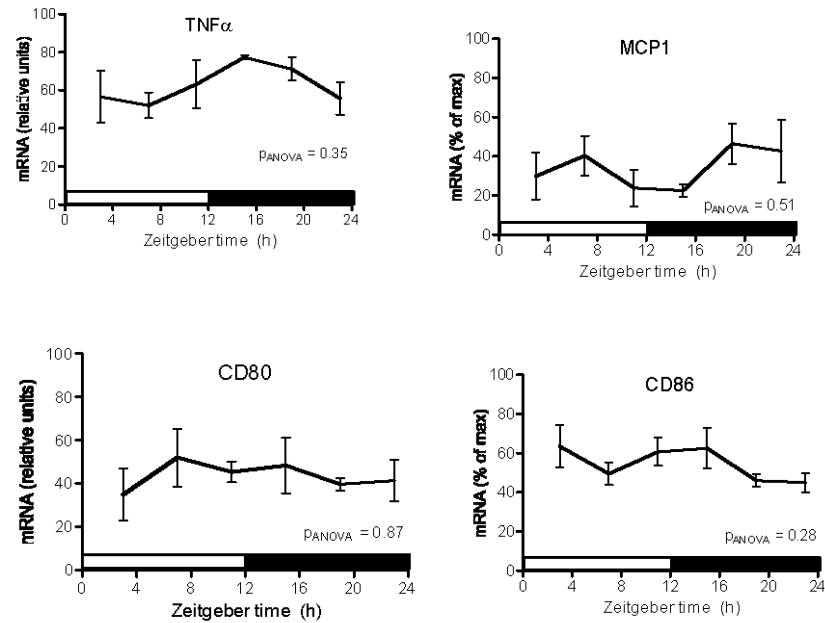

**Figure S3. mRNA amounts of cytokines and co-stimulatory molecules over the daily LD cycle in mouse spleen.**

Relative mRNA amounts at each time point were calculated as the percentage of the maximum value over the 24-h period. Data are mean  $\pm$  s.e.m., n = 5 mice per time point.
